# Supplementary material
Source: PubMed Central journal article supplement (PMC3289534)
Supplement: NIHMS344649-supplement-Supp_Fig_S1.pdf [file NIHMS344649-supplement-Supp_Fig_S1.pdf]

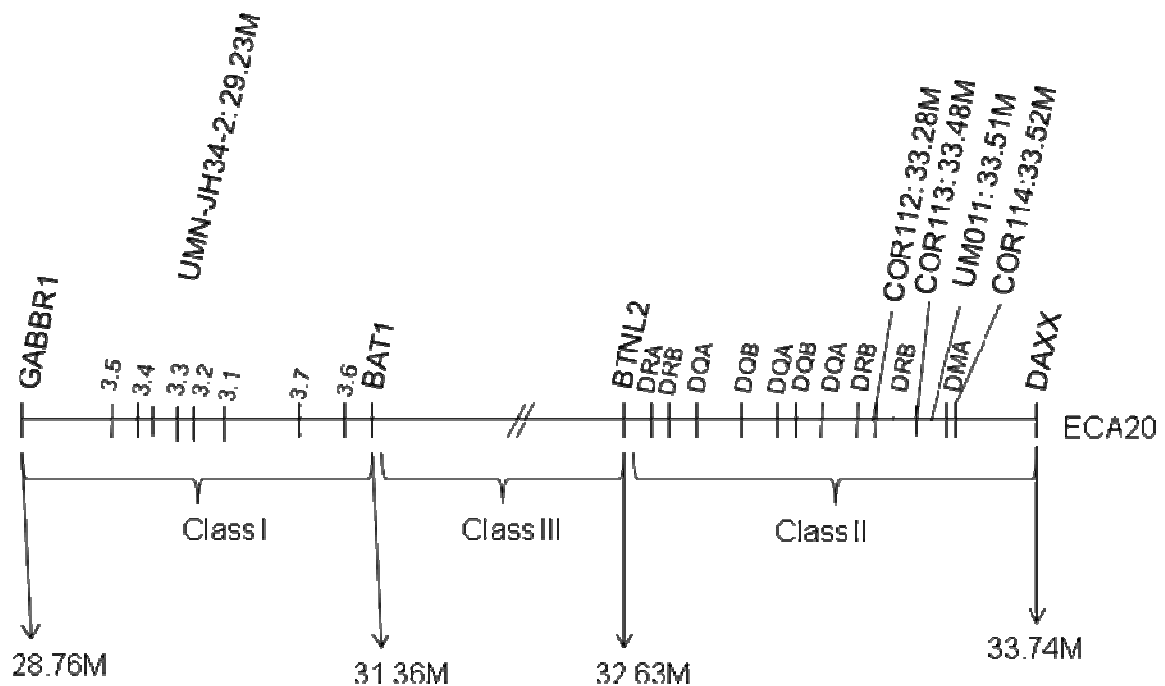

**Figure S1. Map** positions of selected intra-MHC microsatellites in the horse. The equine MHC region on ECA20q14-22 (approx. 5 Mb) is shown, with locations of five microsatellite loci (not drawn to scale). Gene positions were based on annotation reported by Gustafson *et al.* (2003), Tallmadge *et al.* (2005), and the NCBI build of the horse genome sequence (Wade *et al.* 2009).

## References

- Gustafson A.L., Tallmadge R.L., Ramlachan N., Miller D., Bird H., Antczak D.F., Raudsepp T., Chowdhary B.P. & Skow L.C. (2003) An ordered BAC contig map of the equine major histocompatibility complex. *Cytogenetic and genome research* **102**, 189-95.
- Tallmadge R.L., Lear T.L. & Antczak D.F. (2005) Genomic characterization of MHC class I genes of the horse. *Immunogenetics* **57**, 763-74.
- Wade C.M., Giulotto E., Sigurdsson S., Zoli M., Gnerre S., Imsland F., Lear T.L., Adelson D.L., Bailey E., Bellone R.R., Blocker H., Distl O., Edgar R.C., Garber M., Leeb T., Mauceli E., MacLeod J.N., Penedo M.C., Raison J.M., Sharpe T., Vogel J., Andersson L., Antczak D.F., Biagi T., Binns M.M., Chowdhary B.P., Coleman S.J., Della Valle G., Fryc S., Guerin G., Hasegawa T., Hill E.W., Jurka J., Kiialainen A., Lindgren G., Liu J., Magnani E., Mickelson J.R., Murray J., Nergadze S.G., Onofrio R., Pedroni S., Piras M.F., Raudsepp T., Rocchi M., Roed K.H., Ryder O.A., Searle S., Skow L., Swinburne J.E., Syvanen A.C., Tozaki T., Valberg S.J., Vaudin M., White J.R., Zody M.C., Lander E.S. & Lindblad-Toh K. (2009) Genome sequence, comparative analysis, and population genetics of the domestic horse. *Science* **326**, 865-7.
