# Supplementary material
Source: PubMed Central journal article supplement (PMC3289534)
Supplement: NIHMS344649-supplement-Supp_Fig_S3.pdf [file NIHMS344649-supplement-Supp_Fig_S3.pdf]

(a)

|                                |          | ELA serotype |     |            |
|--------------------------------|----------|--------------|-----|------------|
|                                |          | +            | -   | $\Sigma^a$ |
| msat <sup>b</sup><br>haplotype | +        | a            | c   | a+c        |
|                                | -        | b            | d   | b+d        |
|                                | $\Sigma$ | a+b          | c+d | n          |

(b)

|          |          | ELA-A1  |     |          |             |          | ELA-A2  |     |          |             |          | ELA-A3  |     |          |
|----------|----------|---------|-----|----------|-------------|----------|---------|-----|----------|-------------|----------|---------|-----|----------|
|          |          | +       | -   | $\Sigma$ |             |          | +       | -   | $\Sigma$ |             |          | +       | -   | $\Sigma$ |
| msat A1  | +        | 51      | 2   | 53       | msat<br>A2  | +        | 29      | 2   | 31       | msat A3     | +        | 58      | 3   | 61       |
|          | -        | 5       | 376 | 381      |             | -        | 7       | 396 | 403      |             | -        | 4       | 369 | 373      |
|          | $\Sigma$ | 56      | 378 | 434      |             | $\Sigma$ | 36      | 398 | 434      |             | $\Sigma$ | 62      | 372 | 434      |
| $r^c$    | =        | 0.93    |     |          | $r$         | =        | 0.86    |     |          | $r$         | =        | 0.93    |     |          |
|          |          | ELA-A4  |     |          |             |          | ELA-A5  |     |          |             |          | ELA-A6  |     |          |
|          |          | +       | -   | $\Sigma$ |             |          | +       | -   | $\Sigma$ |             |          | +       | -   | $\Sigma$ |
| msat A4  | +        | 17      | 0   | 17       | msat<br>A5  | +        | 31      | 4   | 35       | msat A6     | +        | 14      | 1   | 15       |
|          | -        | 3       | 414 | 417      |             | -        | 4       | 395 | 399      |             | -        | 8       | 411 | 419      |
|          | $\Sigma$ | 20      | 414 | 434      |             | $\Sigma$ | 35      | 399 | 434      |             | $\Sigma$ | 22      | 412 | 434      |
| $r$      | =        | 0.92    |     |          | $r$         | =        | 0.88    |     |          | $r$         | =        | 0.76    |     |          |
|          |          | ELA-A7  |     |          |             |          | ELA-A8  |     |          |             |          | ELA-A9  |     |          |
|          |          | +       | -   | $\Sigma$ |             |          | +       | -   | $\Sigma$ |             |          | +       | -   | $\Sigma$ |
| msat A7  | +        | 10      | 1   | 11       | msat<br>A8  | +        | 18      | 0   | 18       | msat A9     | +        | 7       | 0   | 7        |
|          | -        | 3       | 420 | 423      |             | -        | 2       | 414 | 416      |             | -        | 1       | 148 | 149      |
|          | $\Sigma$ | 13      | 421 | 434      |             | $\Sigma$ | 20      | 414 | 434      |             | $\Sigma$ | 8       | 148 | 156      |
| $r$      | =        | 0.83    |     |          | $r$         | =        | 0.95    |     |          | $r$         | =        | 0.93    |     |          |
|          |          | ELA-A10 |     |          |             |          | ELA-A15 |     |          |             |          | ELA-A19 |     |          |
|          |          | +       | -   | $\Sigma$ |             |          | +       | -   | $\Sigma$ |             |          | +       | -   | $\Sigma$ |
| msat A10 | +        | 75      | 6   | 81       | msat<br>A15 | +        | 4       | 3   | 7        | msat<br>A19 | +        | 8       | 0   | 8        |
|          | -        | 13      | 340 | 353      |             | -        | 0       | 427 | 427      |             | -        | 6       | 420 | 426      |
|          | $\Sigma$ | 88      | 346 | 434      |             | $\Sigma$ | 4       | 430 | 434      |             | $\Sigma$ | 14      | 420 | 434      |
| $r$      | =        | 0.86    |     |          | $r$         | =        | 0.75    |     |          | $r$         | =        | 0.75    |     |          |

**Figure S3.** 2x2 contingency tables for correlation coefficient ( $r$ ) analysis in 218 serotyped and microsatellite (msat) typed horses: (a) design of 2x2 contingency tables (b) microsatellite haplotypes and all pooled statistics. All haplotypes showed strong correlation ( $r > 0.7$ ), validating the utility of intra-MHC microsatellite typing in the horse.

<sup>a</sup>  $\Sigma$  = total.

<sup>b</sup> microsatellite.

<sup>c</sup>  $r = (ad - bc) / \sqrt{(a+b)(c+d)(a+c)(b+d)}$  (Klein 1986).

## References

Klein J. (1986) The Antibody. In: *Natural History of the Major Histocompatibility Complex*. (ed. by Anonymous ), pp. 233-90. John Wiley & Sons, Inc., New York, NY.
