# Supplementary material
Source: PubMed Central journal article supplement (PMC3289534)
Supplement: NIHMS344649-supplement-Supp_Table_S1.pdf [file NIHMS344649-supplement-Supp_Table_S1.pdf]

**Table S1.** Microsatellite allele size and number of animals positive for each allele in a sample population of 320 horses and 33 unknown breed ponies<sup>a</sup>.

| Microsatellite Locus/Location | Allele (bp) | Horse | Pony |
|-------------------------------|-------------|-------|------|
| UMN-JH34-2 - 29,232,117 bp    |             |       |      |
|                               | 193         | 3     |      |
|                               | 197         | 28    | 1    |
|                               | 203         | 5     |      |
|                               | 205         | 26    |      |
|                               | 207         | 84    | 5    |
|                               | 209         | 12    | 16   |
|                               | 211         | 163   | 4    |
|                               | 215         | 14    | 1    |
|                               | 217         | 38    | 3    |
|                               | 219         | 44    | 2    |
|                               | 221         | 149   |      |
|                               | 223         | 1     |      |
| COR112- 33,282,568 bp         |             |       |      |
|                               | 236         | 120   |      |
|                               | 243         | 20    |      |
|                               | 244         | 1     | 2    |
|                               | 248         | 1     | 3    |
|                               | 250         | 1     |      |
|                               | 252         | 45    | 8    |
|                               | 254         | 107   | 2    |
|                               | 256         | 19    |      |
|                               | 258         | 2     | 3    |
|                               | 260         | 14    | 14   |
|                               | 262         | 163   | 9    |
|                               | 264         | 36    |      |
|                               | 268         | 20    | 2    |
| COR113- 33,480,869 bp         |             |       |      |
|                               | 260         | 88    | 17   |
|                               | 264         | 56    |      |
|                               | 266         | 104   | 3    |
|                               | 268         | 121   | 8    |
|                               | 270         | 89    | 7    |
|                               | 272         | 55    |      |
|                               | 274         | 48    | 4    |
|                               | 280         | 11    | 5    |
| UM011- 33,510,218 bp          |             |       |      |
|                               | 160         | 1     |      |
|                               | 164         | 1     |      |
|                               | 166         | 6     | 7    |
|                               | 168         | 93    | 6    |
|                               | 170         | 31    |      |
|                               | 172         | 126   | 14   |
|                               | 174         | 70    |      |
|                               | 176         | 55    | 5    |
|                               | 177         | 1     | 11   |
|                               | 178         | 7     | 1    |
|                               | 179         | 83    |      |
|                               | 180         | 62    |      |
|                               | 184         | 36    | 7    |
| COR114- 33,516,405 bp         |             |       |      |
|                               | 235         | 73    |      |
|                               | 237         | 3     |      |
|                               | 239         | 4     |      |

---

|     |     |    |
|-----|-----|----|
| 241 | 81  | 14 |
| 243 | 136 | 10 |
| 245 | 91  | 8  |
| 247 | 78  | 15 |
| 249 | 45  | 8  |
| 251 | 5   |    |
| 255 | 55  |    |

<sup>a</sup> Ponies are shown separately to emphasize that some microsatellite alleles were more commonly detected in ponies than in other breeds of horses tested.
