# Supplementary material
Source: PubMed Central journal article supplement (PMC3289534)
Supplement: NIHMS344649-supplement-Supp_Table_S2.pdf [file NIHMS344649-supplement-Supp_Table_S2.pdf]

**Table S2.** Correlation between MHC microsatellite (msat) haplotypes and serological (sero) ELA haplotypes in 218 serotyped and msat-typed horses<sup>a</sup>

| msat Haplotype     | sero ELA Haplotype | <i>r</i> <sup>b</sup> | Breed <sup>c</sup> (sero+/msat+) | sero-/msat+                                             | sero+/msat-                     |
|--------------------|--------------------|-----------------------|----------------------------------|---------------------------------------------------------|---------------------------------|
| A1                 | A1                 | 0.93                  | SB (52)                          | SB(1), TB(1)                                            | SB(5)                           |
| A2                 | A2                 | 0.86                  | TB(28), Old (1)                  | TB(1), SB(1)                                            | QH(1), TB(1), WB(1), P(3), U(1) |
| A3a                | A3                 | 0.93                  | TB(12), WB(2), P(1)              | TB(1)                                                   | TB(1), SB(1), AR(1), P(1)       |
| A3b                | A3                 |                       | TB(19), QH(1), P(2), WB(3), U(1) | 0                                                       |                                 |
| A3c                | A3                 |                       | TB(9)                            | 0                                                       |                                 |
| A3d                | A3                 |                       | TB(2)                            | 0                                                       |                                 |
| A3e                | A3                 |                       | SB(6)                            | SB(2)                                                   |                                 |
| A4a                | A4                 | 0.92                  | SB(4)                            | 0                                                       | SB(2), U(1)                     |
| A4b                | A4                 |                       | SB(8)                            | 0                                                       |                                 |
| A4c                | A4                 |                       | SB(5)                            | 0                                                       |                                 |
| A5a                | A5                 | 0.88                  | TB(3), SB(27)                    | TB(2), SB(2)                                            | TB(4)                           |
| A5b                | A5                 |                       | Old (1)                          | 0                                                       |                                 |
| A6                 | A6                 | 0.76                  | SB(14)                           | SB(1)                                                   | TB(2), SB(2), P(1), QH(1), U(2) |
| A7                 | A7                 | 0.83                  | SB(9), TB(1)                     | SB(1)                                                   | P(1), TB(1), SB(1)              |
| A8                 | A8                 | 0.95                  | SB(17), MFT (1)                  | 0                                                       | APP(1), SB(1)                   |
| A9a                | A9                 | 0.93                  | TB(7), WB(1)                     | U(2)                                                    | TB(1)                           |
| A9b                | A9                 |                       | TB(3)                            | 0                                                       |                                 |
| A10a               | A10                | 0.86                  | SB(47)                           | SB(2)                                                   | TB(4), SB(8), U(1)              |
| A10b               | A10                |                       | SB(14), TB(2)                    | 0                                                       |                                 |
| A10c               | A10                |                       | SB(7)                            | U(1)                                                    |                                 |
| A10d               | A10                |                       | SB(7)                            | SB(3)                                                   |                                 |
| A15                | A15                | 0.75                  | TB(4)                            | TB(1), SB, (1), U(1)                                    | 0                               |
| A19                | A19                | 0.75                  | TB(6), U(2)                      | 0                                                       | TB(4), P(1), U(1)               |
| COR <sup>d</sup>   |                    |                       |                                  | TB(11), SB(9), AR(7), QH(2), APP(2), P(13), WB(1), U(2) |                                 |
| Blank <sup>e</sup> |                    |                       |                                  | TB(7), SB(6), QH(3), AR(1), WB(1), MFT(1), P(10), U(7)  |                                 |

<sup>a</sup> Data collected from 218 horses (2n=436 chromosomes) with 353 “ELA-A“ haplotypes, 47 COR haplotypes, and 36 blank haplotypes.

<sup>b</sup> Correlation coefficient (*r*) was analyzed for each haplotype. For sub-haplotypes, *r* values were calculated individually and the combined statistics are reported here. For detailed data and calculations, see **Figure S3**.

<sup>c</sup> Breeds: APP= Appaloosa; AR= Arabian; Han= Hanoverian; MFT= Missouri Fox Trotter; Old= Oldenburg; P= unknown breed pony, presumably mixed breed; QH= Quarter horse; SB= Standardbred; TB= Thoroughbred; WB= warmblood; U= breed of horse unknown, presumably mixed breed.

<sup>d</sup> This row is the summary all of COR haplotypes (listed in **Table 1**) that were identified in this subset of horses.

<sup>e</sup> This row represents the number horses which were serotyped and had allele combinations which did not meet haplotype definition.
