# Supplementary material
Source: PubMed Central journal article supplement (PMC3289534)
Supplement: NIHMS344649-supplement-Supp_Table_S3.pdf [file NIHMS344649-supplement-Supp_Table_S3.pdf]

**Table S3.** Equine MHC microsatellite haplotype frequencies<sup>a</sup> across breeds

| Microsatellite Haplotype | Breed <sup>b</sup> |             |             |           |
|--------------------------|--------------------|-------------|-------------|-----------|
|                          | TB (n=63)          | SB-P (n=90) | SB-T (n=33) | AR (n=26) |
| A1                       | 0.008              | 0.178       | 0.303       | 0         |
| A2                       | 0.168              | 0.006       | 0           | 0         |
| A3a                      | 0.032              | 0           | 0           | 0         |
| A3b                      | 0.168              | 0           | 0           | 0         |
| A3c                      | 0.016              | 0           | 0           | 0         |
| A3d                      | 0.040              | 0           | 0           | 0         |
| A3e                      | 0                  | 0.017       | 0.076       | 0         |
| A4a                      | 0                  | 0.022       | 0           | 0         |
| A4b                      | 0                  | 0.033       | 0.030       | 0         |
| A4c                      | 0                  | 0.028       | 0.015       | 0         |
| A5a                      | 0.104              | 0.150       | 0.030       | 0         |
| A5b                      | 0                  | 0           | 0           | 0         |
| A6                       | 0                  | 0.028       | 0.152       | 0         |
| A7                       | 0.008              | 0.044       | 0.015       | 0         |
| A8                       | 0                  | 0.089       | 0           | 0         |
| A9a                      | 0.136              | 0           | 0           | 0         |
| A9b                      | 0.008              | 0           | 0           | 0         |
| A10a                     | 0                  | 0.256       | 0.091       | 0         |
| A10b                     | 0.016              | 0.056       | 0.045       | 0         |
| A10c                     | 0                  | 0.011       | 0.076       | 0         |
| A10d                     | 0                  | 0.006       | 0.121       | 0         |
| A15                      | 0.032              | 0.006       | 0           | 0         |
| A19                      | 0.032              | 0           | 0           | 0.038     |
| COR1                     | 0.040              | 0           | 0           | 0         |
| COR2                     | 0.024              | 0           | 0           | 0         |
| COR3                     | 0.008              | 0           | 0           | 0         |
| COR4                     | 0.024              | 0           | 0           | 0         |
| COR5                     | 0.024              | 0           | 0           | 0         |
| COR6                     | 0                  | 0.006       | 0           | 0.115     |
| COR7                     | 0                  | 0           | 0           | 0.135     |
| COR8                     | 0                  | 0           | 0           | 0.096     |
| COR9                     | 0                  | 0           | 0           | 0.058     |
| COR10                    | 0                  | 0           | 0           | 0.058     |
| COR11                    | 0                  | 0           | 0           | 0.019     |
| COR12                    | 0                  | 0           | 0           | 0         |
| COR13                    | 0                  | 0           | 0           | 0         |
| COR14                    | 0                  | 0           | 0           | 0         |
| COR15                    | 0                  | 0           | 0           | 0         |
| COR16                    | 0                  | 0           | 0           | 0         |
| COR17                    | 0                  | 0           | 0           | 0         |
| COR18                    | 0                  | 0           | 0           | 0         |
| COR19                    | 0                  | 0           | 0           | 0         |
| COR20                    | 0                  | 0           | 0           | 0         |
| COR21                    | 0                  | 0           | 0           | 0         |
| Microsatellite Haplotype | Breed <sup>b</sup> |             |             |           |
|                          | TB (n=63)          | SB-P (n=90) | SB-T (n=33) | AR (n=26) |
| COR22                    | 0.016              | 0           | 0           | 0         |
| COR23                    | 0                  | 0.011       | 0           | 0         |
| COR24                    | 0                  | 0.006       | 0.03015     | 0         |
| COR25                    | 0                  | 0.017       | 0           | 0         |

|                       |       |       |       |       |
|-----------------------|-------|-------|-------|-------|
| COR26                 | 0     | 0     | 0     | 0.058 |
| COR27                 | 0     | 0     | 0     | 0.058 |
| Subtotal <sup>c</sup> | 0.904 | 0.967 | 0.970 | 0.635 |
| Blank <sup>d</sup>    | 0.096 | 0.033 | 0.030 | 0.365 |
| Total                 | 1.000 | 1.000 | 1.000 | 1.000 |

<sup>a</sup> Haplotype frequency determined by direct haplotype counting.

<sup>b</sup> Breed: TB= Thoroughbred; SB-P= Standardbred Pacer; SB-T= Standardbred Trotter; AR= Arabian.

<sup>c</sup> Sum of frequencies of microsatellite allele combinations that met the haplotype definition.

<sup>d</sup> Microsatellite allele combinations that did not meet the haplotype definition.
