# Supplementary material
Source: PubMed Central journal article supplement (PMC3289534)
Supplement: NIHMS344649-supplement-Supp_Table_S4.pdf [file NIHMS344649-supplement-Supp_Table_S4.pdf]

**Table S4.** Equine MHC microsatellite primer sequences

| Microsatellite Locus    | Location <sup>b</sup> (bp) | No. Alleles Detected | Repeat Motif      | Primers                  | Fluorescent Label |
|-------------------------|----------------------------|----------------------|-------------------|--------------------------|-------------------|
| UMN-JH34-2 <sup>a</sup> | 29,232,117                 | 12                   | (CA) <sub>n</sub> | F: ttggtctttgcaggtatgg   | 6FAM              |
|                         |                            |                      |                   | R: tctcccttctctttgtcc    |                   |
| COR112                  | 33,282,568                 | 13                   | (CA) <sub>n</sub> | F: ttacctggtattggtatttgg | NED               |
|                         |                            |                      |                   | R: tcaccactaaatctcaaatcc |                   |
| COR113                  | 33,480,869                 | 8                    | (CA) <sub>n</sub> | F: tgttagaactgccaggag    | NED               |
|                         |                            |                      |                   | R: tcatcagttccttgccctagc |                   |
| UM011 <sup>c</sup>      | 33,510,218                 | 13                   | (CA) <sub>n</sub> | F: tgaagtagaaaggatgtgg   | NED               |
|                         |                            |                      |                   | R: tctcagagcagaagtcctcg  |                   |
| COR114                  | 33,516,405                 | 10                   | (CA) <sub>n</sub> | F: tcaaatccacactcccttc   | 6FAM              |
|                         |                            |                      |                   | R: tccataaagatgggacactg  |                   |

<sup>a</sup> GenBank: EF531702. Primers used in this study were developed independently.

<sup>b</sup> Position of the first nucleotide of each microsatellite repeat motif on ECA20.

<sup>c</sup> GenBank: AF195130.
